# Supplementary material for: Mobility of nitrogen in ashes and soils impacted by wildfires in northern California and Nevada
Source: Royal Society of Chemistry journal article supplement (doi:10.1039/d5em00533g), 2025-11-20
Supplement: d5em00533g1.pdf [file d5em00533g1.pdf]

## Supplementary Information (SI)

### Mobility of nitrogen in ashes and soils impacted by wildfires

Travis Numan<sup>1</sup>, Abrar Shahriar<sup>1</sup>, Srinidhi Lokesh<sup>1</sup>, Anil Timilsina<sup>1</sup>, Sudarshan Basyal<sup>1</sup>, Yasi Raeofy<sup>2</sup>, Simon R Poulson<sup>3</sup>, Vera Samburova<sup>2</sup>, Yu Yang<sup>1\*</sup>

<sup>1</sup>Department of Civil and Environmental Engineering, University of Nevada, 1664 N. Virginia St, Reno, NV, 89557

<sup>2</sup>Desert Research Institute, 2215 Raggio Parkway, Reno, NV, 89512

<sup>3</sup>Department of Geological Sciences & Engineering, University of Nevada, 1664 N. Virginia St, Reno, NV, 89557

\*Corresponding author: [yuy@unr.edu](mailto:yuy@unr.edu)

### Text SI Cross calibration for N measurement and DON determination

Standards of KNO<sub>3</sub> were measured by Shimadzu TOC-L, and calibration curve was developed:

$$C_{NO_3} = a_{NO_3} Area_{NO_3} + b_{NO_3} \quad (1)$$

where C<sub>NO<sub>3</sub></sub> is the concentration (mg N/L) of NO<sub>3</sub><sup>-</sup>, Area<sub>NO<sub>3</sub></sub> is the integration area of TOC-L signal for NO<sub>3</sub><sup>-</sup>, a<sub>NO<sub>3</sub></sub> is the regression coefficient of TOC-L signal for NO<sub>3</sub><sup>-</sup>. b<sub>NO<sub>3</sub></sub> is the regression intercept of TOC-L signal for NO<sub>3</sub><sup>-</sup>.

Standards of NH<sub>3</sub>/NH<sub>4</sub><sup>+</sup> (ammonia) were measured by Shimadzu TOC-L, and calibration curve was developed:

$$C_{NH_3} = a_{NH_3} Area_{NH_3} + b_{NH_3} \quad (2)$$

where C<sub>NH<sub>3</sub></sub> is the concentration (mg N/L) of NH<sub>3</sub>/NH<sub>4</sub><sup>+</sup>, Area<sub>NH<sub>3</sub></sub> is the integration area of TOC-L signal for NH<sub>3</sub>/NH<sub>4</sub><sup>+</sup>, a<sub>NH<sub>3</sub></sub> is the regression coefficient of TOC-L signal for NH<sub>3</sub>/NH<sub>4</sub><sup>+</sup>. b<sub>NH<sub>3</sub></sub> is the regression intercept of TOC-L signal for NH<sub>3</sub>/NH<sub>4</sub><sup>+</sup>.

Standards of organic nitrogen (glycine) was measured by Shimadzu TOC-L, and calibration curve for DON was developed:

$$C_{DON} = a_{DON} Area_{DON} + b_{DON} \quad (3)$$

where  $C_{DON}$  is the concentration (mg N/L) of DON,  $Area_{DON}$  is the integration area of TOC-L signal for DON,  $a_{DON}$  is the regression coefficient of TOC-L signal for DON.  $b_{DON}$  is the regression incept of TOC-L signal for DON.

Based on these, the concentration of DON was calculated using the equation below

$$C_{DON} = a_{DON} \left( area_{TDN} - \frac{C_{NO_3} - b_{NO_3}}{a_{NO_3}} - \frac{C_{NH_3} - b_{NH_3}}{a_{NH_3}} \right) + b_{DON} \quad (4)$$

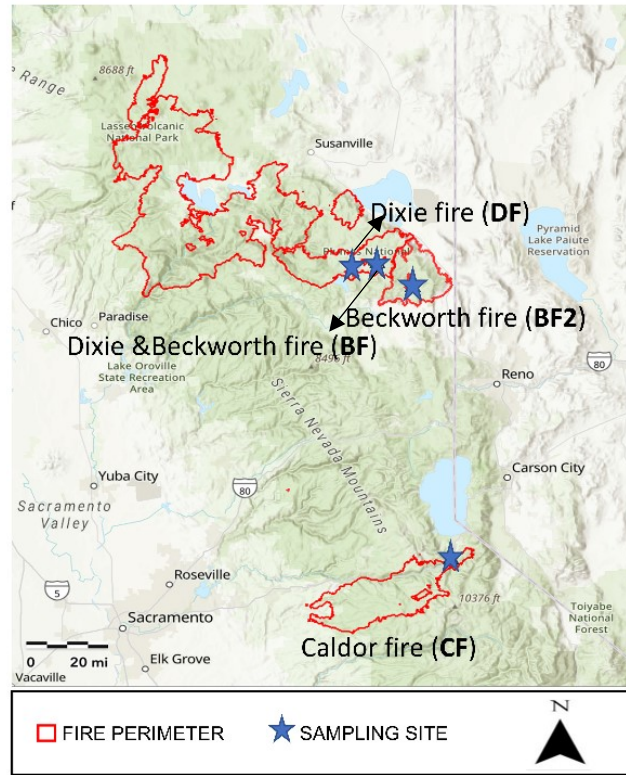

**Figure S1.** Map of sampling sites (blue stars) of wildfires that occurred in 2021, including the Dixie (DF), Beckwourth Complex (BF), and Caldor (CF) fires (with red lines for the borders of wildfire regions). BF2 represents the overlapped region of BF and DF fires.

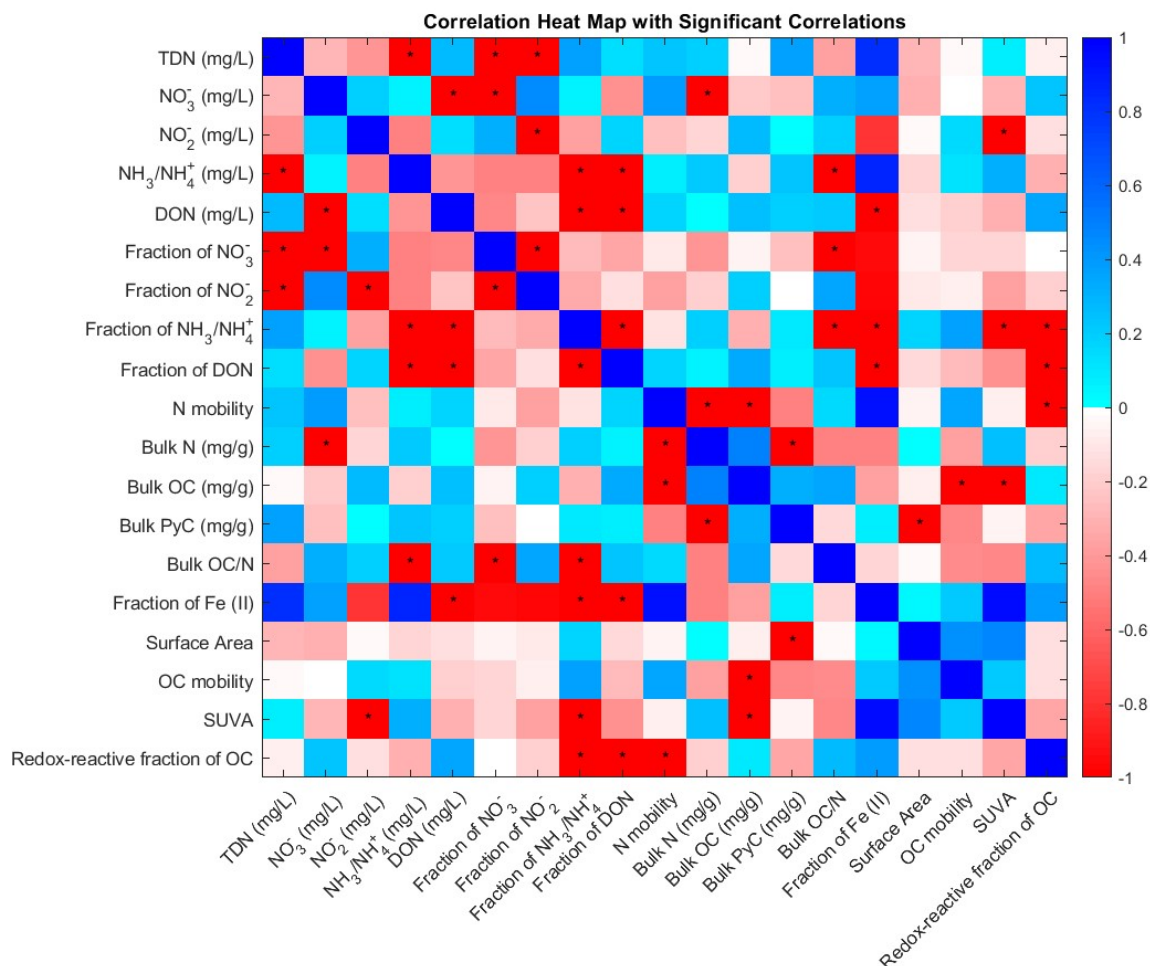

**Figure S2.** Heat map illustrating Pearson correlation coefficients between variables measured in this study for the mobility of nitrogen (N). Asterisks indicate statistically significant correlations ( $p < 0.05$ ). Blue cells represent positive relationships, when red cells indicate negative correlation. Abbreviations and variables: TDN (mg/L): total dissolved nitrogen;  $\text{NO}_3^-$ ,  $\text{NO}_2^-$ ,  $\text{NH}_3/\text{NH}_4^+$ , and DON (dissolved organic nitrogen) (mg/L) represent their concentrations in the mobile phase, respectively; Fraction of  $\text{NO}_3^-$ ,  $\text{NO}_2^-$ ,  $\text{NH}_3/\text{NH}_4^+$ , and DON stand for their fractions in the dissolved N; N mobility stands for the mobile fraction of N; Bulk PyC (mg/g) stands for the bulk content of pyrogenic carbon; Bulk OC/N represents the molar ratio of bulk organic carbon (OC) relative to N; Fraction of Fe (II) stands for the fraction of Fe(II) in total iron (Fe) measured by XANES; SUVA ( $1/\text{m}^*\text{L}/\text{mg}$ ) is the specific UV absorption coefficient at 254 nm; Redox-reactive fraction of OC stands for the fraction of redox-reactive fraction measured for mobile OC.

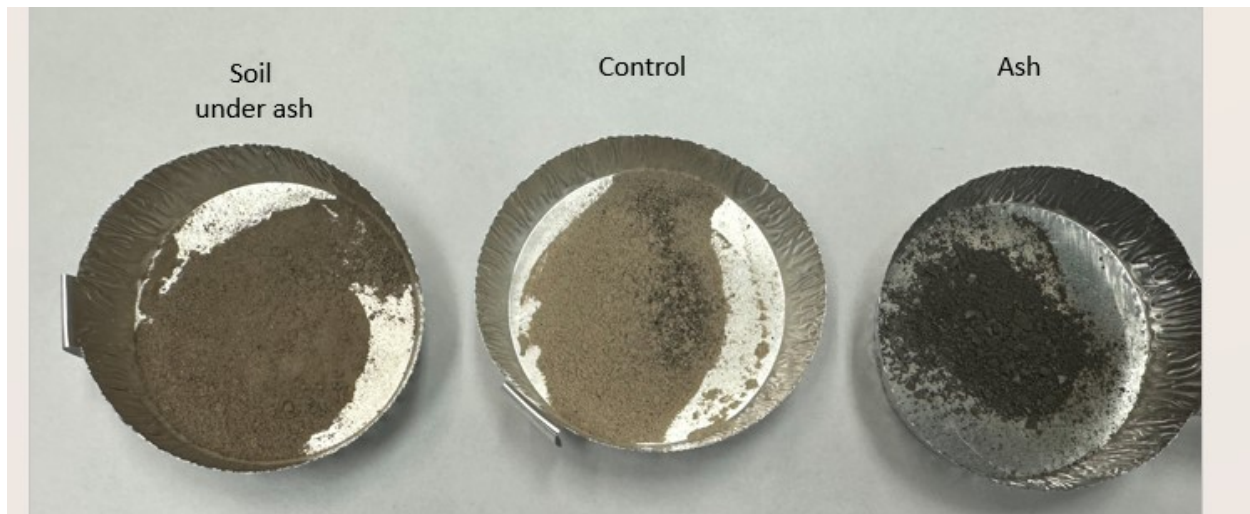

**Figure S3.** Photos of ashes, soil under ash, and control soils.

**Table S1.** Summary of sampling site and fire characteristics [1, 2].

| Fire                           | Burned area (acres) | Wildfire Period   | Unburned to Low Severity | Medium Severity | High Severity | GPS Coordinates of sampling sites   |
|--------------------------------|---------------------|-------------------|--------------------------|-----------------|---------------|-------------------------------------|
| Beckworth Fire (BF2)           | 105,670             | 07/03/21-09/22/21 | 44%                      | 53%             | 3%            | 39° 53' 21.1"N<br>120° 12' 02.9" W  |
| Caldor Fire (CF)               | 221,952             | 08/14/21-10/25/21 | 47%                      | 40%             | 13%           | 38° 50' 37.0" N<br>120° 01' 59.8" W |
| Dixie Fire (DF)                | 963,309             | 07/03/21-10/22/21 | 45%                      | 30%             | 25%           | 39° 58' 41.9" N<br>120° 21' 24.8" W |
| Dixie & Beckwourt h fires (BF) |                     | 07/03/21-10/22/21 |                          |                 |               | 39°53'21.1"N<br>120°12'02.9"W       |

**Table S2.** Mobility of organic carbon (OC) in ashes (-A), soil under ashes (-S) and control soils (-C) from BF, DF, CF, and BF-2 sites as well as key parameters. Details can be found in our previous report [2]. Bulk OC/N represents the bulk molar ratio of OC/N. Bulk PyC stands for bulk pyrogenic carbon content. SUVA is the specific UV absorption coefficient at 254 nm; Redox-reactive fraction of OC stands for the fraction of redox-reactive fraction measured for mobile OC. Bulk OC/N represents molar ratio of OC/N. Fraction of Fe (II) stands for the fraction of Fe(II) in total iron (Fe) measured by XANES. Average and std represents average values and standard deviation collected from triplicate measurements for most parameters (the replicate numbers are higher for fraction of Fe(II)).

| Average | Bulk OC<br>(mg/g) | Bulk OC/N | Mobile fraction<br>of OC | Bulk PyC<br>(mg/g) | Surface area<br>(m <sup>2</sup> /g) | Fraction of<br>Fe(II) | Redox fractions | SUVA of mobile OC<br>(1/m <sup>2</sup> *L/mg) |
|---------|-------------------|-----------|--------------------------|--------------------|-------------------------------------|-----------------------|-----------------|-----------------------------------------------|
| BF-A    | 8.11              | 8.11      | 0.02                     | 8.72               | 6.95                                | 0.66                  | 0.07            | 4.40                                          |
| BF-S    | 19.40             | 7.34      | 0.03                     | 5.82               | 8.84                                | 0.10                  | 0.07            | 2.40                                          |
| BF-C    | 4.30              | 4.67      | 0.07                     | 2.08               | 12.30                               | 0.57                  | 0.14            | 3.52                                          |
| DF-A    | 9.19              | 2.08      | 0.03                     | 7.74               | 16.33                               |                       | 0.00            | 10.69                                         |
| DF-S    | 9.48              | 11.37     | 0.07                     | 0.88               | 18.90                               |                       | 0.00            | 4.97                                          |
| DF-C    | 11.87             | 19.12     | 0.02                     | 0.83               | 13.25                               |                       | 0.00            | 4.06                                          |
| CF-A    | 43.72             | 15.48     | 0.03                     | 7.58               | 13.75                               |                       | 0.00            | 2.01                                          |
| CF-S    | 25.74             | 10.25     | 0.03                     | 13.68              | 3.87                                |                       | 0.15            | 1.37                                          |
| CF-C    | 24.43             | 22.28     | 0.01                     | 10.33              | 7.32                                |                       | 0.00            | 3.35                                          |
| BF2-A   | 57.38             | 16.53     | 0.01                     | 3.83               | 13.39                               |                       | 0.56            | 0.77                                          |
| BF2-S   | 21.83             | 17.87     | 0.03                     | 3.71               | 17.04                               |                       | 0.22            | 4.39                                          |
| BF2-C   | 6.30              | 17.30     | 0.03                     | 0.85               | 9.30                                |                       | 0.94            | 2.67                                          |
| Std     | Bulk OC           | Bulk OC/N | Mobility of OC           | Bulk PyC           | Surface area                        | Fraction of Fe(II)    | Redox fractions | SUVA of mobile OC                             |
| BF-A    | 0.76              | 0.31      | 0.01                     | 0.35               | 0.37                                | 0.07                  | 0.05            | 1.11                                          |
| BF-S    | 2.61              | 0.64      | 0.01                     | 0.10               | 1.74                                | 0.15                  | 0.05            | 0.75                                          |

|       |      |      |      |      |       |      |      |      |
|-------|------|------|------|------|-------|------|------|------|
| BF-C  | 0.25 | 1.93 | 0.01 | 0.04 | 5.53  | 0.01 | 0.09 | 0.69 |
| DF-A  | 0.38 | 1.58 | 0.01 | 0.29 | 0.40  |      | 0.00 | 1.01 |
| DF-S  | 1.81 | 1.91 | 0.03 | 0.03 | 5.04  |      | 0.00 | 2.76 |
| DF-C  | 0.11 | 0.16 | 0.01 | 0.04 | 0.10  |      | 0.01 | 0.90 |
| CF-A  | 3.05 | 0.16 | 0.01 | 0.02 | 1.79  |      | 0.00 | 0.86 |
| CF-S  | 2.13 | 0.77 | 0.02 | 0.61 | 0.38  |      | 0.08 | 1.50 |
| CF-C  | 4.60 | 0.67 | 0.00 | 1.02 | 1.41  |      | 0.00 | 0.52 |
| BF2-A | 5.38 | 0.06 | 0.00 | 0.06 | 0.54  |      | 0.00 | 0.39 |
| BF2-S | 3.17 | 1.25 | 0.01 | 0.05 | 16.73 |      | 0.24 | 2.56 |
| BF2-C | 1.09 | 1.65 | 0.01 | 0.02 | 8.62  |      | 0.03 | 1.73 |

## References:

1. Samburova, V.; Schneider, E.; Rüger, C.P.; Inouye, S.; Sion, B.; Axelrod, K.; Bahdanovich, P.; Friederici, L.; Raeofy, Y.; Berli, M.; et al. Modification of Soil Hydroscopic and Chemical Properties Caused by Four Recent California, USA Megafires. *Fire* **2023**, *6*, 186, doi:10.3390/fire6050186.
2. Numan, T.L., S.; Shahriar, Abrar; Timilsina, A.; Lard, M.L.; Clark, J.; Raeofy, Y.; Zhao, Q.; Poulson, S.R.; Verburg, P.; Richardson, J.A.; Cook, R.L.; Samburova, V.; Yang, Y. Post-wildfire mobilization of organic carbon. *Soil Systems* **2025**.
